# Supplementary material for: A novel three-dimensional coordination polymer constructed with mixed-valence dimeric copper(i,ii) unitsElectronic supplementary information (ESI) available: synthesis and data for 1. See http://www.rsc.org/suppdata/cc/b2/b210914j/
Source: Royal Society of Chemistry journal article supplement (doi:10.1039/b210914j), 2003-01-15
Supplement: b210914j.doc [file b210914j.doc]

# Supplementary data

*Synthesis and data*: for **1**: CuSO4·5H2O (1.0 mmol), 4-pyCN (1.0 mmol) and KF (1.0 mmol) in 10 mL H2O heated in a 23 mL Teflon cup at 150 °C for 2-3 day gives two kinds of crystalline products: dark blue crystals [Cu2(4-pya)3] **1** (yield *ca.* 35%) as well as deep blue crystals [Cu(4-pya)2].2H2O8c (yield *ca.* 15%), which can be manually separated under a microscope. X-ray powder diffraction analysis was made to ensure that the dark blue samples were single-phased (Fig. S4). The TG analyses reveal that **1** has an onset temperature for decomposition of *ca.* 250 °C. Anal. Calc. for C18H11Cu2N2O5 **1**: C, 46.76; H, 2.40; N, 6.06%. Found: C, 46.62; H, 2.39; N, 5.72%. IR data (KBr, cm-1): 3065w, 1621vs, 1605s, 1554s, 1414s, 1396vs, 1380vs, 1228m, 1211m, 1056m, 1008w, 869w, 849m, 776s, 695s, 468w, 438w. Susceptibility data were recorded on a Quantum design MPMS2 magnetometer. Temperature scans were recorded between 2 and 300 K using a cooling and measuring field of 10 kOe. Field-dependent Magnetisation was studied between 0-50 kOe at 2 K. Sample diamagnetism was corrected for by employing Pascal’s constants (O. Kahn, *Molecular Magnetism*, Wiley-VCH, Weinheim, 1993).
